# Supplementary material for: The demise of caterpillar fungus in the Himalayan region due to climate change and overharvesting
Source: PubMed Central journal article supplement — Proc Natl Acad Sci U S A. 2018 Oct 22;115(45):11489–94. doi: 10.1073/pnas.1811591115 (PMC6233077; doi:10.1073/pnas.1811591115), 2018-10-22
Supplement: pnas.1811591115.sapp.pdf [file pnas.1811591115.sapp.pdf]

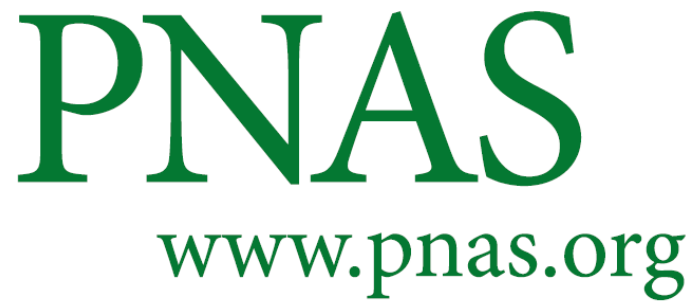

## Supplementary Information for

The demise of caterpillar fungus in the Himalayan region due to climate change and overharvesting

Kelly A. Hopping, Stephen M. Chignell, Eric F. Lambin

Kelly A. Hopping  
Email: [kellyhopping@boisestate.edu](mailto:kellyhopping@boisestate.edu)

Eric F. Lambin  
Email: [elambin@stanford.edu](mailto:elambin@stanford.edu)

### **This PDF file includes:**

Supplementary text: Supplementary Methods  
Figs. S1 to S5  
Tables S1 to S6  
References for SI reference citations

## Supplementary Information Text

### Supplementary Methods

#### *Systematic literature review*

We conducted a systematic review of the literature on caterpillar fungus (1). To identify papers for inclusion, on March 6, 2017, we searched Web of Knowledge for the terms “*Ophiocordyceps sinensis*” and “*Cordyceps sinensis*” (its former Latin name) and filtered out research categories not related to environmental or social topics, which eliminated most of the pharmacological studies that otherwise dominated the search results. This produced 54 papers for “*Ophiocordyceps sinensis*” and 200 papers for “*Cordyceps sinensis*.” We scanned titles and abstracts to further eliminate papers about its artificial cultivation, medical studies, and other species of *Cordyceps*. We then supplemented this with searches on Google Scholar, the China National Knowledge Infrastructure database, the Digital Library of the Commons, and with content alerts from Google Scholar for these search terms, which continued to update results through December 31, 2017. Additional publications were the result of “snowball sampling” from the references cited in other papers. In total, these searches produced 396 papers, books, reports, theses, and presentations that contained information about the caterpillar fungus social-ecological system, published between 1723–2017, and written in English, French, German, Chinese, or Japanese. Publications in English and French were read by the first author, and publications in other languages were translated by native or fluent speakers.

Of the 396 publications, we identified 73 that reported trends in its production. To focus on sources of LEK, we filtered out studies that were based on model results or harvest amounts without supporting LEK ( $n = 12$ ), and those that were author assertions, including sources that did not clearly differentiate whether a statement was LEK or the author’s own interpretation ( $n = 13$ ). We also excluded studies that did not describe any methods for obtaining LEK ( $n = 14$ ), that only repeated results from earlier studies ( $n = 4$ ), or that were too unclear to interpret confidently ( $n = 1$ ). This left 29 studies with information about LEK of caterpillar fungus production trends and their causes.

### *Local ecological knowledge*

We conducted interviews about local ecological knowledge (LEK) of caterpillar fungus production trends during the 2017 harvest season in collection areas in Rebgong county, Qinghai and in Damshung county, Tibet; in caterpillar fungus markets in Xining and Rongbo, Qinghai, Lhasa and Damshung, Tibet, and Chengdu, Sichuan; and in person or by phone with others identified through our network of collaborators and respondents. All interviews were conducted in the local dialect of Tibetan by a native speaker except one in Mandarin and three in English with interviewees who were also fluent in those languages. Of the 49 interviewees, 12 were female (24.5%) and 37 were male (75.5%), and all were ethnically Tibetan. On average, they had been involved in the caterpillar fungus trade for a mean of 16.9 years and median of 18 years (st. dev. = 10.2 years; 4 people did not give responses about their involvement time). Twenty-two people (45%) had been involved with it for 20 years or longer, while only 11 people (22%) had less than a decade of experience. Three men had started collecting it as early as the 1970s. For interviews that occurred outside of collection areas, we recorded the location of the collection area to which they were referring.

In addition to our 49 interviews, we included 10 studies with clearly stated sample sizes and quantitative LEK responses ( $N = 768$  interviewees), 6 studies with clearly stated sample sizes but only qualitative LEK information that may not have been from their full sample of interviewees ( $N = 3919$ ), and 13 studies with only qualitative LEK information and no stated sample size. For these studies and our interviews, we used a combination of a priori and emergent codes to classify LEK of changes in caterpillar fungus production and their causes (Table S3). A priori codes included responses about trends and causes that we anticipated encountering and/or wanted to examine from the outset (e.g., “increasing,” “decreasing,” “climate change,” “overexploitation,” “competition”). Emergent codes arose as we began to read the LEK responses and found other frequently mentioned themes that did not fit easily into our a priori categories (e.g., “fluctuating,” “unsustainable,” “weather” distinct from broader climate trends). We ensured that two coders reached consensus on code designations for each study before proceeding with analysis. We assigned confidence weightings to all LEK data as follows. For our interviews, we

weighted responses by the number of respondents within each county (see sample sizes in Table S4). For data from the literature, quantitative studies with clearly stated sample sizes (all of which were larger than the largest number of people we interviewed per county) were assigned the largest weighting from our interviews (i.e., 16), and all others for which the exact number of respondents was unclear were assigned the smallest weighting from our interviews (i.e., 1).

We organized LEK data spatially at the level of county (China), gewog (Bhutan), or district (Nepal and India). We define the timing of the LEK data as the latest year in which field data were collected for each study. To understand spatial trends, we consider only data collected within the past decade (2008–2017) as indicative of contemporary LEK. To understand temporal trends, we fit quasi-binomial regressions to data from all years (1999–2017), but removed one study for which the year of data collection was unclear. For 4 studies that described a qualitative response across 2-3 administrative units (e.g., counties), we displayed these responses across all relevant administrative units when examining spatial trends, but used only one response per study when examining temporal trends in order to avoid weighting them disproportionately.

Few of the published studies were explicitly designed to investigate LEK of caterpillar fungus production, and many had limitations due to unclear methods or results with regard to our aims. In the case of our interviews, sample sizes for specific areas tended to be low, given our opportunistic sampling of people from diverse areas encountered at regional markets. Recognizing these caveats, we consider the broader regional picture that emerges from these data, rather than relying on them as strong evidence for the changes occurring in any particular location.

### *Species distribution modeling*

We obtained caterpillar fungus presence points for the species distribution models by extracting caterpillar fungus location data from all publications in our review that included spatial information for occurrence points or collection areas. Each point underwent a quality control check to ensure accuracy of the input data. From each publication, we either used coordinates reported, asked authors to provide

location details, or digitized figures with maps. Administrative boundaries, village locations, roads, rivers, and graticules served as reference points for georectifying the maps. We calculated the root mean square error (RMSE) between reference points and digitized figures. Fine-scale locational errors have been found to have minimal effect on model performance, particularly for presence-background approaches such as ours (described below) (2, 3). Still, precise georectification can provide slight improvements when modeling more specialized species and when using predictor variables derived from empirical data such as elevation (as opposed to modeled surfaces) (4, 5). After removing 2 publications for which precise georectification was not possible ( $RMSE > 1000$  m), the mean RMSE across all digitized figures was 293 m (but dropped to 278 m if only considering publications with data used in the final models, after performing all quality control steps described in more detail below). If maps showed collection area boundaries instead of point locations, we reduced uncertainty caused by digitization error by first creating an inverse buffer within the collection area equal to the RMSE distance for that figure. Then, we subtracted the buffer area from the original collection boundary and generated a random point within the remaining area.

To prevent inclusion of erroneous caterpillar fungus locations in our models, we inspected all presence points using high-resolution imagery in Google Earth. Of the 561 points intended to denote collection areas, we removed 108 because they were in settlements, dense forests, lakes, or other highly improbable locations. We maintained a strict removal criterion for points within 1 km of towns to prevent apparent convenience sampling on the part of study authors from biasing our models toward lower elevations. We removed 2 duplicate points and an additional 36 that had imprecise or incorrect locations, as indicated by low precision of their coordinates, our difficulty rectifying source images from the literature ( $RMSE > 1$  km), or if they had very different elevations from what was reported for them in the source data. These disqualification criteria removed 70 of the 218 locations (32%) reported by Yan et al. (6). Our final caterpillar fungus location dataset is available at <https://purl.stanford.edu/ww909xk7776>.

We restricted our analyses to elevations between 3000–5500-m a.s.l., given caterpillar fungus' reported distribution range (7, 8). Although there were a few points in Gansu and northeastern Qinghai

below 3000 m that may have been credible (2700–2860 m) (9, 10), all others below this range did not meet the quality control criteria. Moreover, Li et al. determined that the lowest confirmed *O. sinensis* specimen was found at 3,084 m (7), which suggests that reports of lower locations should be viewed with skepticism until they can be verified. The highest location was at 5500 m in Arunachal Pradesh, India (8).

Our environmental predictor variables included elevation, MODIS Vegetation Continuous Fields, and CHELSA bioclimatic variables (Table S5). To maintain parsimony and ecological relevance, we developed a decision tree and used insights from LEK to select variables for inclusion in the model that avoided ecological redundancy and highly correlated variables (11, 12) (Fig. S4, S5). To prepare the predictor variables for use in the Software for Assisted Habitat Modeling (SAHM) (13), we masked water pixels and computed 17-year means (2000–2016) for all MODIS data of percent non-tree vegetation, non-vegetated, and tree cover. To match the spatial resolution of the elevation and MODIS data, we resampled the 19 bioclimatic predictor variables to 250-m using a nearest neighbor interpolation within SAHM. We removed all highly correlated variables from the models, but based on the importance of winter precipitation that emerged from our review of caterpillar fungus LEK, we decided to retain mean precipitation of the coldest quarter, despite its correlation with precipitation of the wettest quarter being above our 0.70 correlation cutoff ( $r = 0.72$ ).

As a final processing step, we removed presence points if they fell outside the bounds of the predictor layers ( $n = 2$ ) or in the same pixel as another point ( $n = 13$ ), leaving 400 presences. To reduce the effect of sampling bias in our presence data, we generated 400 random pseudo-absence points within a binary kernel density estimator surface with a 99% isopleth and ad hoc optimization method (14).

Then, we used the point data and environmental variables to develop habitat predictions from four models: boosted regression trees (BRT) (15), random forest (RF) (16), multivariate adaptive regression splines (MARS) (17-19), and a generalized linear model (GLM) (20). Each of these models is widely used in the species distribution modeling literature, well-documented, and able to be run in open-source R programming language. BRT is an ensemble classifier that can be understood as an additive

regression model, with the advantages of being able to fit complex nonlinear relationships, automatically handle interaction effects between predictors, and requires no prior data transformation (15). RF is a popular ensemble classifier and has been shown to be highly accurate and efficient with high-dimensional, multi-source data sets (21, 22). MARS is a non-parametric technique that fits piecewise logistic regressions to build a flexible model (23). It is similar to generalized additive models, but is faster and offers improvements for models of a single species (19). GLM is the simplest and most interpretable of the four models, and its implementation in SAHM uses a bidirectional, stepwise covariate selection procedure to identify a parsimonious model (23). For MARS and GLM, we used the default settings in the SAHM package (23). For BRT, we set  $n\ trees = 1000$  (15) and used SAHM's internal settings to determine the learning rate and other parameters (23). For RF, we set  $n\ trees = 500$  (22) and used the tuneRF function to determine the  $mTry$  value that minimizes out-of-bag prediction error (24).

The primary output from each model is a continuous raster surface showing the relative likelihood of caterpillar fungus occurrence for each 250-m cell. To convert this to a discretized (binary) map as an input for further analysis, we applied a statistically-determined threshold based on maximizing the sum of sensitivity and specificity (25). We evaluated model predictions using a 10-fold cross-validation on the discretized maps. This generated a suite of evaluation statistics, including area under the receiver operator characteristic curve (AUC) (26), percent correctly classified, sensitivity, specificity, and the true skill statistic (TSS) (27). We calculated variable importance scores for the predictor variables included in each model using a model-independent method in SAHM, whereby the change in AUC is recorded when each variable is successively permuted between the presence and background data (23). A larger change in AUC indicates a larger influence. We then converted the AUC differences into values of relative importance. Finally, we created a multivariate environmental similarity surface (MESS) map to identify areas where the models were extrapolating beyond the training data (28).

### *Permafrost comparison*

The 30-arcsecond modeled permafrost distribution data, which we compared to our caterpillar fungus locations and habitat predictions, are scaled from 0 to 1 and interpreted as ranging from permafrost occurring “only in very favorable conditions” (e.g., only with a sufficient combination of appropriate radiation exposure, snow drift, vegetation, ground material, etc.) to occurring “in nearly all conditions,” regardless of ideal solar radiation, etc. (29). Using a threshold of 0.5, we considered areas above this level to be “likely” to have permafrost, and areas below this threshold to be “unlikely” to have it. We then calculated the proportion of presence points and habitat area located in likely permafrost area, as well as the mean geodesic distance between all presence points and their nearest areas likely to have permafrost. For the distance calculation, we excluded 69 presence points in Gansu, Sichuan, and Yunnan prefectures in China, since these prefectures had little likely permafrost according to our 0.50 threshold and other estimates of permafrost extent in China (30).

### *Environmental determinants of caterpillar fungus production*

If collection data for multiple years were available, or if a range of values was reported, we took the mean value for each administrative unit. For Nepal and Bhutan, we only used data starting at least two years after collection became legal (in 2001 and 2004, respectively) to ensure that we were not capturing a potential “spin-up” time, when collection effort may have been lower and thus less representative of true production amounts. For China, we included data from official reports starting in 2000, due to China’s longer history of legal collection. Had we limited China to data starting in 2003, to match the timing for Nepal, the final production level calculations would not have resulted in different production bin assignments, so we opted to retain more years of data for calculating means. We discarded data from years with a known impediment to collection or reporting, such as when snow hindered access to harvesting areas, years when collectors in Bhutan were allowed to sell outside the official auction system, or when official statistics underestimated collection amounts relative to field data gathered by researchers (31, 32). We did not include data that were the result of study authors’



calculations (e.g., Winkler's estimates for large areas of Nepal and India (33)). In cases where no other data were available (i.e., Qinghai, Sichuan, and Gansu in China and Humla, Jumla, Mugu, and Kalikot in Nepal), we included collection amounts from the literature that were provided without a well-defined source, but only if the context of the publication suggested that these were from within our acceptable timeframe for each country. We treat these with more caution in our interpretation of subsequent analyses using these data.

In China, three prefectures had collection data at the county level that met our quality control criteria. For Nagchu, Chamdo, and Nyingtri, county data from specific years allowed us to calculate the proportion of caterpillar fungus in those counties relative to the total for their prefecture in that same year. We then used these proportions to calculate the average amount collected in those counties based on the multi-year prefectural mean (2000-2009).

To calculate production level for each administrative unit, we divided mean collection amounts ( $\text{kg yr}^{-1}$ ) by the area of habitat ( $\text{km}^2$ ) predicted by the ensemble of our four species distribution models. Due to the uncertainty associated with the production and area estimates, we used tertiles to bin the production level data into categories of “low”, “medium”, and “high.”

We performed ordered logistic regressions on binned production data with environmental variables selected by the majority of species distribution models as predictors. This ensured that we included factors thought to be relevant to caterpillar fungus growth, based on insights from the species distribution models and a priori information from the literature and LEK, thereby avoiding “a ‘shot-gun’ attempt to find significant variables” (34). For bioclimatic variables, we followed the methods described below to derive a customized climate data set and then calculated mean conditions for each pixel from 2000-2013, corresponding to the time period of the collection data. For each predictor variable, we calculated its mean across the predicted habitat area in each administrative unit. Using the `polr` function in the MASS package in R (35, 36), we ran regressions with a logistic link function on all combinations with three or fewer predictors, excluding highly correlated ( $r > 0.70$ ) and collinear ( $\text{VIF} > 5$ ) variables. We limited each model to a maximum of three predictors to avoid over-fitting to our relatively small data

set ( $N = 33$  administrative units). We used Akaike information criterion scores corrected for small samples (AICc) (37) and log-likelihood tests to assess model performance and parameter significance. We present several models with similar AICc scores ( $\Delta\text{AICc} < 2$  from the model with smallest AICc) to avoid some of the bias associated with selecting a single, minimum adequate model (34), while also prioritizing model parsimony and generalizability (38).

### *Climate change trends*

To assess changes in climatic conditions likely to affect caterpillar fungus, we conducted pixel-wise linear regressions through time (1979–2013) for each climate variable (39). For this we calculated annual bioclimatic variables equivalent to those used in the species distribution models and logistic regression analyses, using monthly CHELSA precipitation and temperature data from 1979-2013 (40) and the “biovars” function in the dismo package in R (41).

We conducted all analyses in R (v. 3.4.3) and created all maps in R and ArcGIS (v. 10.5.1).

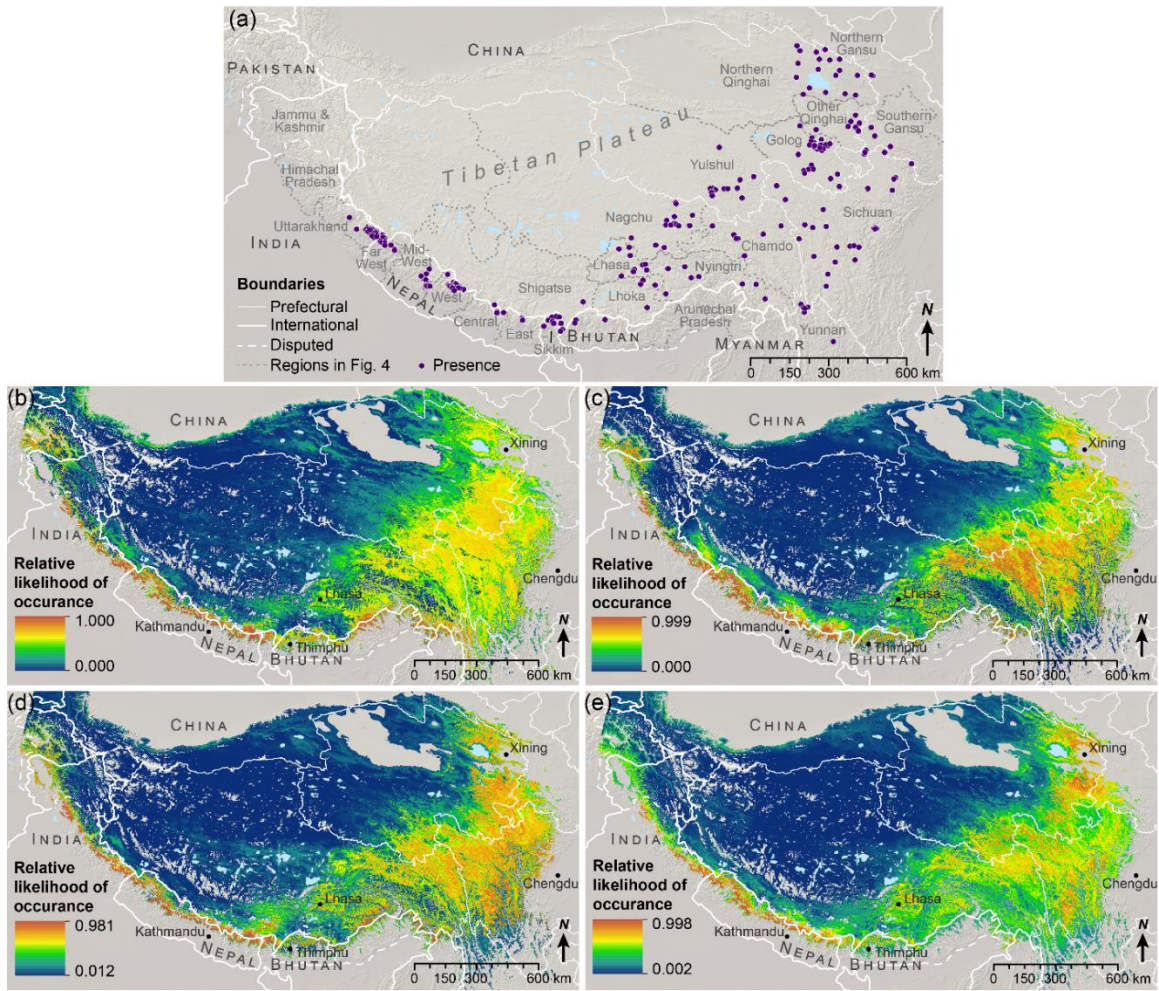

**Fig. S1.** Species distribution models indicate where the likelihood of caterpillar fungus occurrence is highest. Caterpillar fungus presence points ( $N = 400$ ) used as inputs to the models are shown in (a). Results from four models are shown: generalized linear model (b), multivariate adaptive regression splines (c), boosted regression tree (d), and random forest (e).

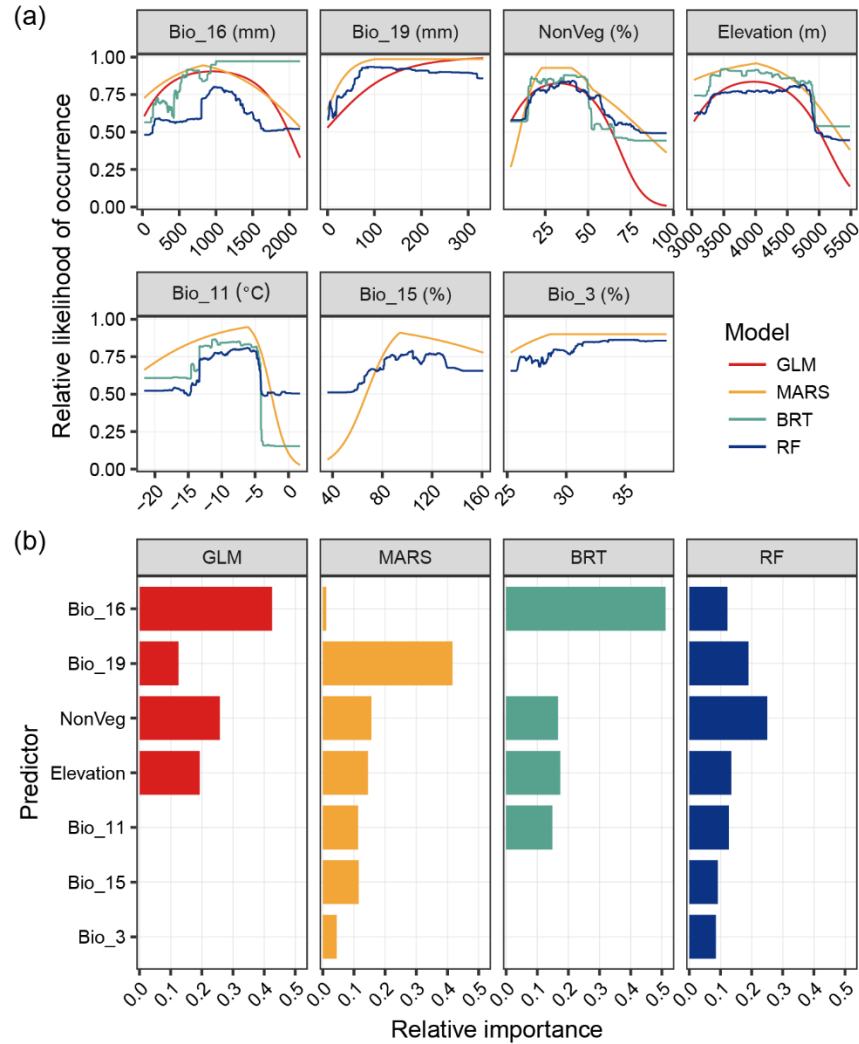

**Fig. S2.** Four species distribution models identified relationships between suitable caterpillar fungus habitat and environmental conditions. Response curves are shown for environmental variables selected by the models (a): generalized linear model (GLM), multivariate adaptive regression splines (MARS), boosted regression tree (BRT), random forest (RF). Relative importance scores for each variable are determined from a model-independent comparison of the relative influence of each predictor in each model (b). Predictor variables are: Bio\_16 = precipitation of the wettest quarter, Bio\_19 = precipitation of the coldest quarter, NonVeg = non-vegetated cover, elevation, Bio\_11 = mean temperature of the coldest quarter, Bio\_15 = precipitation seasonality, Bio\_3 = isothermality.

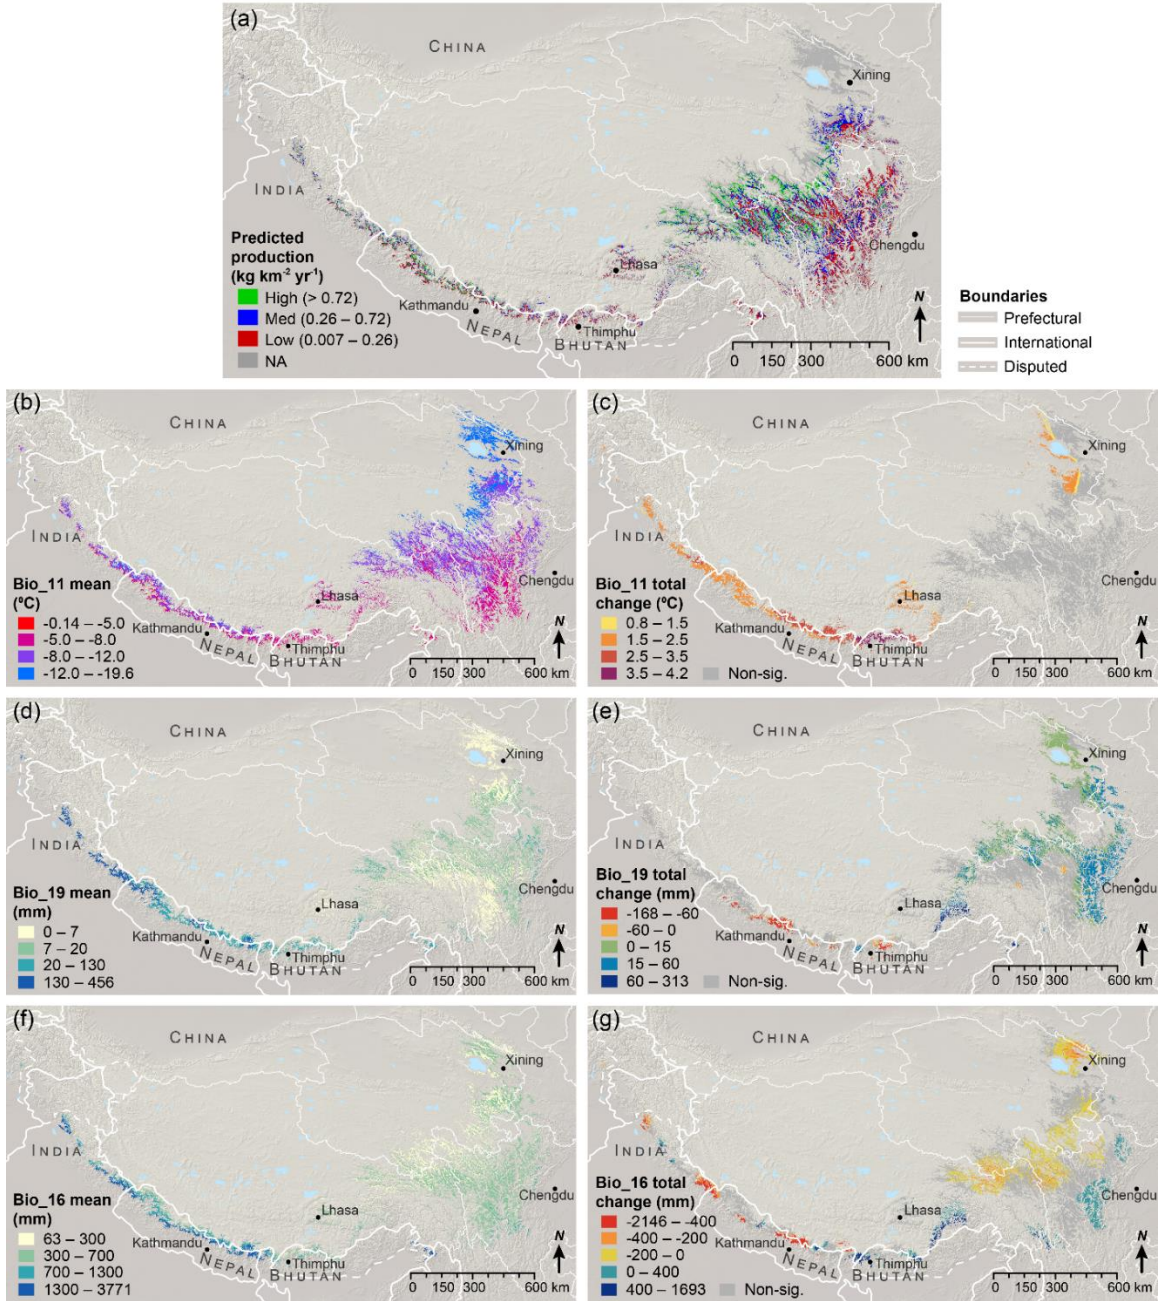

**Fig. S3.** Caterpillar fungus habitat and production are constrained by climate. Logistic regressions predict that production increases with colder winter temperatures (Bio\_11) and higher elevations (a). “NA” denotes areas with elevation or temperature values beyond the range of the data included in the model, which were based on administrative units’ mean conditions from 2000-2013. Mean climatic conditions from 1979-2103 are shown for Bio\_11 (b), Bio\_19 (d), and Bio\_16 (f). The total amount of change from 1979-2013 for Bio\_11 (c), Bio\_19 (e), and Bio\_16 (g) is shown for pixels with significant linear trends ( $p < 0.05$ ).

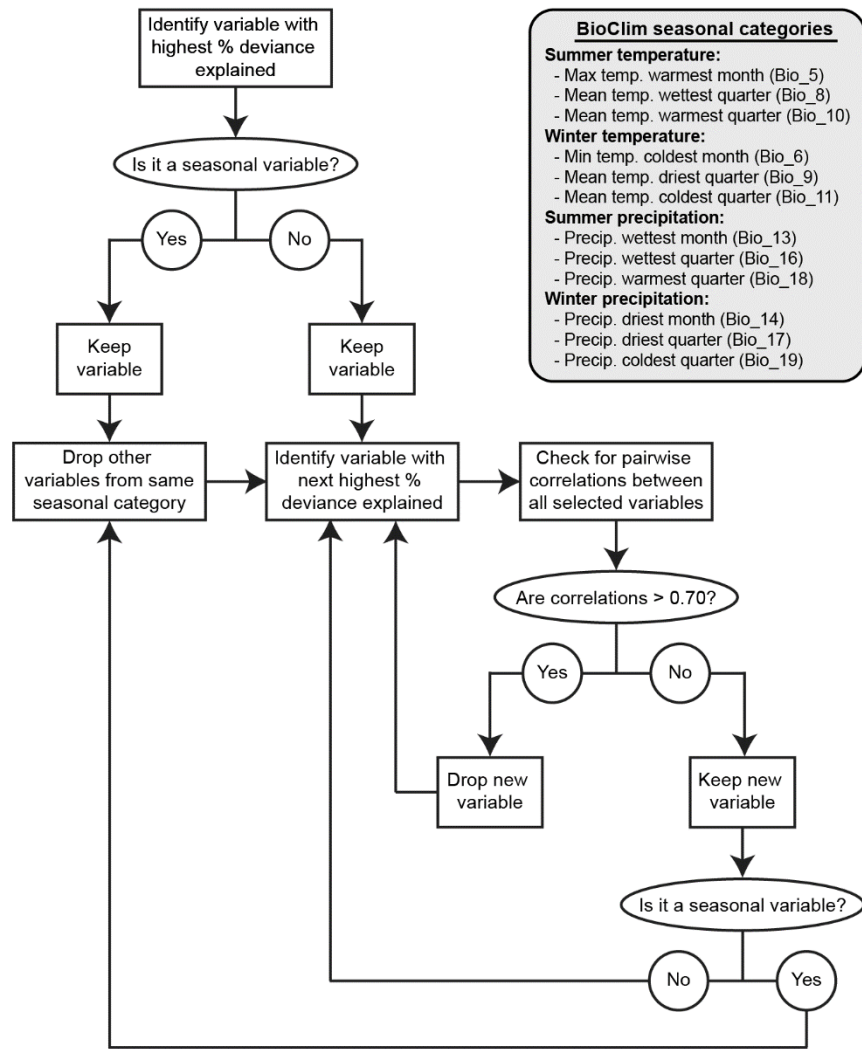

**Fig. S4.** Decision tree for selecting variables to retain in the species distribution model. Due to the study region’s monsoon climate, BioClim variables could be grouped into highly correlated seasonal categories, with “warmest” and “wettest” time periods roughly corresponding to summer conditions, and “driest” and “coldest” corresponding to winter.

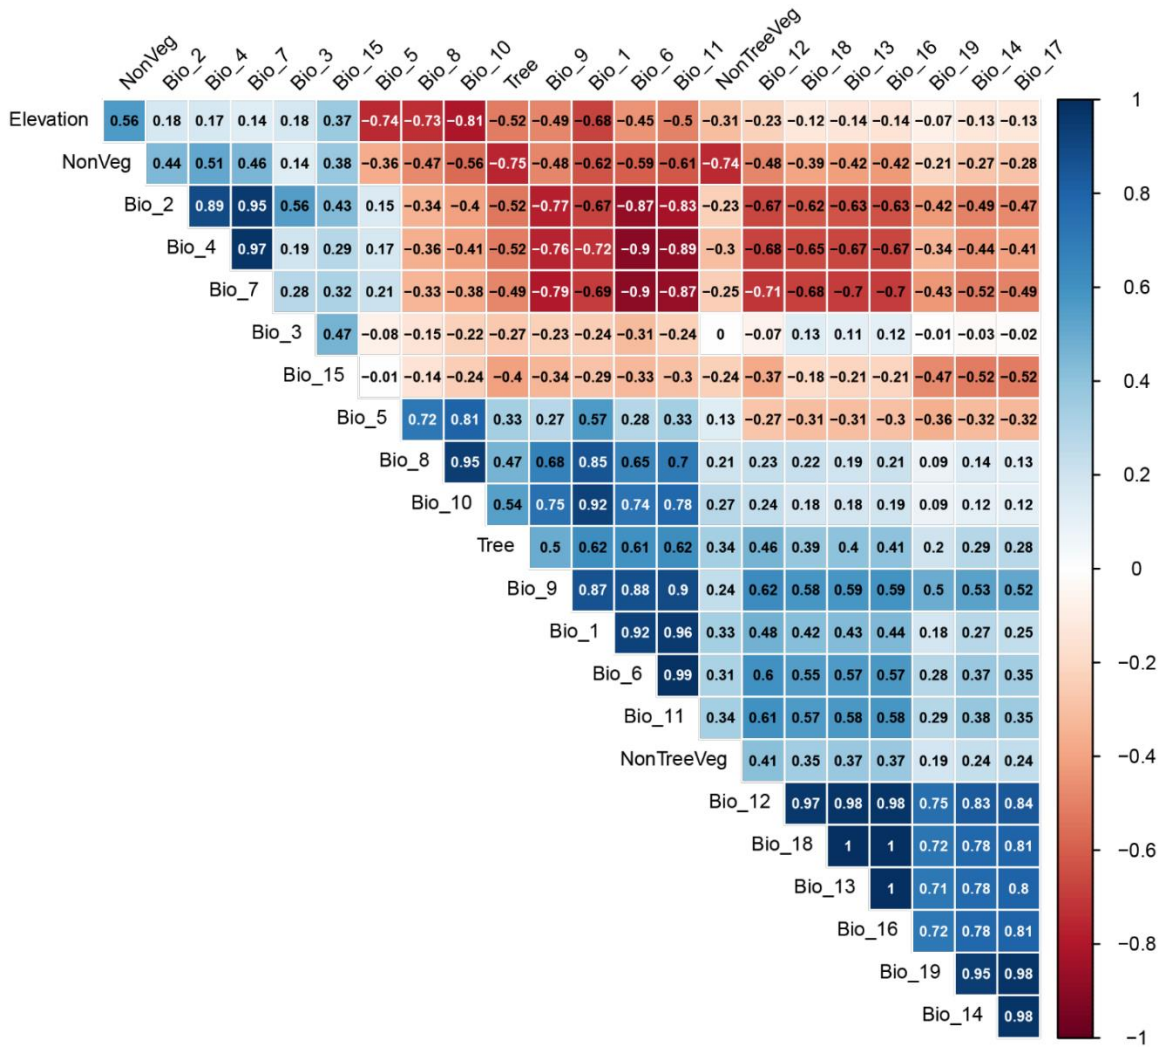

**Fig. S5.** Correlation matrix of all environmental variables considered as candidates for inclusion in the species distribution models, arranged to show clusters of highly correlated variables. Environmental data were extracted for each of the 400 caterpillar fungus presence points used in these models. Following the criterion used by SAHM, the maximum of Spearman, Pearson, and Kendall coefficients are displayed. Coefficients  $> |0.70|$  are in white. (NonVeg = % non-vegetated cover, Bio\_2 = mean diurnal temp range, Bio\_4 = temp seasonality, Bio\_3 = isothermality, Bio\_15 = precip seasonality, Bio\_5 = max temp warmest month, Bio\_8 = mean temp wettest quarter, Bio\_10 = mean temp warmest quarter, Tree = % tree cover, Bio\_9 = mean temp driest quarter, Bio\_1 = annual mean temp, Bio\_6 = min temp coldest month, Bio\_11 = mean temp coldest quarter, NonTreeVeg = % non-tree vegetation cover, Bio\_12 = annual precip, Bio\_18 = precip warmest quarter, Bio\_13 = precip wettest month, Bio\_16 = precip wettest quarter, Bio\_19 = precip coldest quarter, Bio\_14 = precip driest month, Bio\_17 = precip driest quarter.)

**Table S1.** Species distribution model evaluation statistics on test data and total predicted habitat area are shown for four models: generalized linear model (GLM), multivariate adaptive regression splines (MARS), boosted regression tree (BRT), and random forest (RF). Total predicted habitat area refers to the area of pixels generated by binary thresholding of the continuous likelihood surface produced by each model. The percentage of habitat in extrapolated areas is the proportion of the predicted habitat that fell within areas where the model was extrapolating to environmental characteristics beyond those sampled by the presence and background point locations.

| Evaluation statistic                            | GLM     | MARS    | BRT     | RF      |
|-------------------------------------------------|---------|---------|---------|---------|
| AUC train                                       | 0.90    | 0.92    | 0.96    | 0.93    |
| AUC test                                        | 0.88    | 0.90    | 0.91    | 0.93    |
| Correctly Classified (%)                        | 82      | 81      | 81      | 84      |
| Sensitivity                                     | 0.88    | 0.85    | 0.80    | 0.85    |
| Specificity                                     | 0.77    | 0.76    | 0.82    | 0.83    |
| True Skill Statistic                            | 0.64    | 0.62    | 0.62    | 0.68    |
| Total predicted habitat area (km <sup>2</sup> ) | 738,793 | 705,710 | 635,147 | 395,228 |
| Habitat in extrapolated areas (%)               | 1.19    | 2.37    | 0.37    | 1.42    |



**Table S2.** Model comparison of environmental effects on caterpillar fungus production using ordered logistic regression. Model fit statistics are shown for the best-fitting models ( $\Delta\text{AICc} < 2$  from the model with smallest AICc). For the null (intercept-only) model,  $\text{AICc} = 76.63$ ,  $\text{AIC} = 76.51$ ,  $\text{BIC} = 79.50$ , and  $\log \text{likelihood} = -36.25$ .  $P$ -values for each coefficient are from likelihood ratio chi-square tests. Coefficients' standard errors are shown in parentheses.

|                        | Model 1         | Model 2         | Model 3          |
|------------------------|-----------------|-----------------|------------------|
| Bio_11 <sup>1</sup>    | -1.10 (0.29)*** | -1.01 (0.27)*** | -0.88 (0.241)*** |
| Elevation <sup>2</sup> | 0.42 (0.21)*    | 0.45 (0.21)*    |                  |
| Bio_19 <sup>3</sup>    | -0.02 (0.01)    |                 | -0.02 (0.01)*    |
| AICc                   | 59.98           | 60.52           | 61.96            |
| AIC                    | 59.33           | 60.09           | 61.54            |
| BIC                    | 66.81           | 66.08           | 67.52            |
| Log likelihood         | -24.67          | -26.04          | -26.77           |
| Deviance               | 49.33           | 52.09           | 53.54            |
| Pseudo $R^2$           | 0.57            | 0.52            | 0.49             |
| Num. obs.              | 33              | 33              | 33               |

\*\*\* $p < 0.001$ , \*\* $p < 0.01$ , \* $p < 0.05$

<sup>1</sup> Bio\_11 = mean temperature of the coldest quarter

<sup>2</sup> Elevation was rescaled (m/100) to improve model performance

<sup>3</sup> Bio\_19 = precipitation of the coldest quarter

**Table S3.** Description of codes assigned to local ecological knowledge of trends in caterpillar fungus production and their causes.

| Code             | Type     | Description                                                                                                                                                                                                                                      | Exemplary quote                                                                                                                                                                                                                                                                                                                                                                                                                                                                                              |
|------------------|----------|--------------------------------------------------------------------------------------------------------------------------------------------------------------------------------------------------------------------------------------------------|--------------------------------------------------------------------------------------------------------------------------------------------------------------------------------------------------------------------------------------------------------------------------------------------------------------------------------------------------------------------------------------------------------------------------------------------------------------------------------------------------------------|
| Increasing       | A priori | Mention increasing production                                                                                                                                                                                                                    | "Some places are having less and some are having more, and in my place we're having more" (this study; Temchen, China).                                                                                                                                                                                                                                                                                                                                                                                      |
| No change        | A priori | Mention no change in production                                                                                                                                                                                                                  | "The quality and amount isn't changing because they put the soil back after digging, so it doesn't affect the mountain" (this study; Damshung, China).<br>"The amount of caterpillar fungus isn't changing, even with the weather" (this study; Damshung, China).                                                                                                                                                                                                                                            |
| Fluctuating      | Emergent | Refer to transient changes in production from year to year, without invoking a sustained, directional production trend through time; closely connected to "weather" as a causal factor                                                           | "Harvesters mentioned fluctuations of the abundance of <i>O. sinensis</i> from year to year, due to climatic factors such as snow fall and temperature" (42).<br>"The amount changes according to the weather. There hasn't been an overall change in the amount" (this study; Nagchu, China).                                                                                                                                                                                                               |
| Per capita       | A priori | Specify that there is only a decrease in collection amount per capita, not a true decrease in production; closely connected to "competition" as a causal factor                                                                                  | "...collectors made sure to point out that the total <i>Cordyceps</i> population has not decreased, just the number of <i>Cordyceps</i> available per person due to the increase in collectors" (43).                                                                                                                                                                                                                                                                                                        |
| Unsustainable    | Emergent | Indicate an expectation that production could decrease, although it hasn't definitively yet                                                                                                                                                      | "Harvesters are currently concerned that resource yields are threatened and potentially decreasing" (44).                                                                                                                                                                                                                                                                                                                                                                                                    |
| Decreasing       | A priori | Mention decreasing production                                                                                                                                                                                                                    | "The quality is becoming worse and the quantity is becoming less since when I was young. Before in one place I could find 30 pieces, and now I can only find one" (this study; Damshung, China).                                                                                                                                                                                                                                                                                                             |
| Don't know       | A priori | Interviewees report that they don't know if production is changing                                                                                                                                                                               | "...2% indicated that they are not sure if there is less <i>Cordyceps</i> now" (43).                                                                                                                                                                                                                                                                                                                                                                                                                         |
| Weather          | Emergent | Attribute changes in production to interannual fluctuations in weather conditions, without invoking a sustained, directional climate trend through time; closely connected to "fluctuating" production response                                  | "Every year is different. If there's no snow in winter, production isn't good. With snow in the winter and rain during the collection season, it's good" (this study; Tengchen, China).<br>"The amount goes up and down from year to year. The weather is very important. With snow in winter we will find a lot in the spring. Without snow, we can't find it" (this study; Damshung, China).                                                                                                               |
| Climate change   | A priori | Indication of a directional climate trend (even if described as changing "weather"), denoting a sustained change rather than only interannual variations                                                                                         | "It's becoming dry, with less rain, and I can't find as much caterpillar fungus" (this study; Damshung, China).<br>"There's less and less caterpillar fungus because...the weather is changing" (this study; Damshung, China).                                                                                                                                                                                                                                                                               |
| Competition      | A priori | Specify that increased competition among collectors causes lower harvest amounts per capita, but does not affect true production amounts; closely related to "per capita" production response                                                    | "I think in the past there were only 6, 7, 8 people, and they got more pieces. But these years most of the people are harvesting it. So when we put together everything they found, I think there's no big difference from in the past" (this study; Pasho, China).<br>"Thirty years ago there weren't many collectors, so I could find more. Starting in 2008 there was less of it because of more competition to find it. Having more people doesn't make less caterpillar fungus grow" (Damshung, China). |
| Degradation      | Emergent | Mention habitat degradation, livestock grazing impacts, soil degradation                                                                                                                                                                         | "The surface of the land is destroyed a lot now, and the caterpillar fungus can't grow. The soil is destroyed, and the caterpillar fungus can't grow" (this study; Driru, China).<br>"There's less and less caterpillar fungus because there are more yaks and sheep" (this study; Damshung, China).                                                                                                                                                                                                         |
| Overexploitation | A priori | Attribute decreasing production specifically to over-harvesting, or else report that availability is decreasing due to higher collection pressure, without specifying that this was only an apparent effect due to higher competition to find it | "It's decreasing because of over-collection" (this study; Rebgong, China).<br>"There is less and less caterpillar fungus every year because more and more people are collecting" (this study; Damshung, China).<br>"It's really clearly becoming less. Because now it's quite expensive, so people are collecting too much, ...and we lose the balance" (this study; Dartsendo, China).                                                                                                                      |
| Other            | Emergent | Causal factors not captured by the other categories                                                                                                                                                                                              | "...there are less spores or the spores are not able to spread" (43).<br>"[The decrease] is a natural thing" (this study; Rebgong, China).                                                                                                                                                                                                                                                                                                                                                                   |
| Don't know       | A priori | Interviewees report that they don't know why production is changing                                                                                                                                                                              | "There's not less because of competition, but I don't know why there's less" (this study; Rebgong, China).                                                                                                                                                                                                                                                                                                                                                                                                   |

**Table S4.** Data sources and responses for local knowledge of changes in caterpillar fungus production. For changes and their causes, percentages of the number of people who gave each response are reported if quantitative data were available; otherwise, qualitative responses are shown. Percentages for causes add to more than 100% if interviewees gave more than one response. Shaded rows denote data that were collected entirely before 2008 and are therefore not displayed in Fig. 2. If the year in which the data were collected was unclear, we give an assumed year based on the publication date or other methods described by the study authors.

| Country | Province/<br>State* | Dzongkhag/<br>Prefecture/<br>Division/<br>Zone* | Gewog/<br>County/<br>District*          | Study<br>year | Caterpillar<br>fungus<br>changes                                    | Change<br>N <sup>†</sup> | Causes of<br>caterpillar fungus<br>change                                                                                            | Cause<br>N <sup>†</sup> | Ref  |
|---------|---------------------|-------------------------------------------------|-----------------------------------------|---------------|---------------------------------------------------------------------|--------------------------|--------------------------------------------------------------------------------------------------------------------------------------|-------------------------|------|
| Bhutan  |                     | Bumthang                                        | Chokhor                                 | 2008          | 40% decrease,<br>40% no change,<br>20% not<br>reported              | 39                       | 70%<br>overexploitation<br>and degradation,<br>30% not reported <sup>‡</sup>                                                         | 39                      | (45) |
| Bhutan  |                     | Bumthang                                        | Chokhor                                 | 2004–<br>2009 | unsustainable,<br>no change                                         | (168)                    | overexploitation                                                                                                                     |                         | (46) |
| Bhutan  |                     | Paro                                            | Tsento                                  | 2010          | 68% decrease,<br>23% increase,<br>9% no change                      | 23                       |                                                                                                                                      |                         | (47) |
| Bhutan  |                     | Wangdue-<br>phodrang                            | Dangchu,<br>Gangtey,<br>Kazhi,<br>Sephu | 2004–<br>2009 | unsustainable,<br>no change                                         | (226)                    | overexploitation                                                                                                                     |                         | (46) |
| China   | Qinghai             | Golog (Ch:<br>Guoluo)                           | Chikdril (Ch:<br>Jiuzhi)                | 2017          | 100% decrease                                                       | 5                        | 100%<br>overexploitation,<br>20% degradation,<br>20% competition,<br>20% climate<br>change                                           | 5                       | **   |
| China   | Qinghai             | Golog                                           | Gade (Ch:<br>Gande)                     | 2017          | decrease                                                            | 1                        | overexploitation                                                                                                                     | 1                       | **   |
| China   | Qinghai             | Golog                                           | Machen<br>(Ch: Maqin)                   | 2017          | 100% decrease                                                       | 3                        | 50%<br>overexploitation,<br>50% competition,<br>50% don't know                                                                       | 2                       | **   |
| China   | Qinghai             | Tsoshar (Ch:<br>Haidong)                        | Yadzi (Ch:<br>Xunhua)                   | 2017          | per capita                                                          | 1                        | competition                                                                                                                          | 1                       | **   |
| China   | Qinghai             | Malho (Ch:<br>Huangnan)                         | Sogdzong<br>(Ch: Henan)                 | 2017          | decrease                                                            | 1                        |                                                                                                                                      | 1                       | **   |
| China   | Qinghai             | Malho                                           | Rebgong<br>(Ch:<br>Tongren)             | 2017          | 81% decrease,<br>12% per capita,<br>25% fluctuating                 | 16                       | 25%<br>overexploitation,<br>8% degradation,<br>17% competition,<br>8% climate change,<br>25% weather,<br>8% other,<br>25% don't know | 12                      | **   |
| China   | Qinghai             | Malho                                           | Tsekhok<br>(Ch: Zeku)                   | 2017          | 50% decrease,<br>50% no change                                      | 2                        | degradation                                                                                                                          | 1                       | **   |
| China   | Qinghai             | Tsonup (Ch:<br>Haixi)                           | Temchen<br>(Ch:<br>Tianjun)             | 2017          | increase                                                            | 1                        |                                                                                                                                      |                         | **   |
| China   | Qinghai             | Yulshul                                         | Dzato (Ch:<br>Zaduo)                    | 2010–<br>2011 | decrease                                                            |                          |                                                                                                                                      |                         | (48) |
| China   | Qinghai             | Yulshul (Ch:<br>Yulshu)                         | Tridu (Ch:<br>Chengduo)                 | 2006          | fluctuating                                                         |                          | weather                                                                                                                              |                         | (49) |
| China   | Qinghai             | Yulshul                                         | Yulshul (Ch:<br>Yushu)                  | 2013          | decrease                                                            | 1                        | degradation                                                                                                                          |                         | (50) |
| China   | Sichuan             | Kardze (Ch:<br>Ganzi)                           | Dabpa (Ch:<br>Daocheng)                 | 2009          | 56% decrease,<br>4% increase,<br>18% fluctuating,<br>22% don't know | 50                       | competition, climate<br>change, weather                                                                                              |                         | (51) |
| China   | Sichuan             | Kardze                                          | Dartsendo<br>(Ch:<br>Kangding)          | 2017          | decrease                                                            | 1                        | overexploitation,<br>climate change                                                                                                  | 1                       | **   |
| China   | Sichuan             | Kardze                                          | Kardze (Ch:<br>Ganzi)                   | 2017          | decrease                                                            | 1                        |                                                                                                                                      | 1                       | **   |
| China   | Sichuan             | Kardze                                          | Litang                                  | 1999          | fluctuating                                                         |                          | weather                                                                                                                              |                         | (52) |

|       |             |                       |                                     |           |                                                            |        |                                                                                                                       |     |          |
|-------|-------------|-----------------------|-------------------------------------|-----------|------------------------------------------------------------|--------|-----------------------------------------------------------------------------------------------------------------------|-----|----------|
| China | Tibet (TAR) | Chamdo                | Joda (Ch: Jiangda)                  | 2007      | per capita                                                 | 1      |                                                                                                                       |     | (53)     |
| China | Tibet (TAR) | Chamdo (Ch: Changdu)  | Pasho (Ch: Basu)                    | 2017      | decrease, per capita                                       | 1      | competition, climate change                                                                                           | 1   | **       |
| China | Tibet (TAR) | Chamdo                | Tengchen (Ch: Dingqing)             | 2005–2006 | per capita                                                 |        | competition                                                                                                           |     | (54)     |
| China | Tibet (TAR) | Chamdo                | Tengchen                            | 2017      | fluctuating                                                | 1      | weather                                                                                                               | 1   | **       |
| China | Tibet (TAR) | Lhasa (Ch: Lasa)      | Damshung (Ch: Dangxiang)            | 2017      | 67% decrease, 8% per capita, 25% fluctuating, 8% no change | 12     | 22% overexploitation, 11% degradation, 22% competition, 56% climate change, 22% weather overexploitation, degradation | 9   | **       |
| China | Tibet (TAR) | Nagchu (Ch: Naqu)     | Driru (Ch: Biru)                    | 2017      | decrease                                                   | 1      | degradation                                                                                                           | 1   | **       |
| China | Tibet (TAR) | Nagchu                | Nagchu (Ch: Naqu)                   | 2011      | unsustainable                                              |        | degradation                                                                                                           |     | (55)     |
| China | Tibet (TAR) | Nagchu                | Nagchu                              | 2017      | fluctuating                                                | 1      | weather                                                                                                               | 1   | **       |
| China | Tibet (TAR) | Nagchu                | Sogdzong (Ch: Suo)                  | 2017      | decrease                                                   | 1      | overexploitation, climate change                                                                                      | 1   | **       |
| China | Tibet (TAR) | Nyingtri (Ch: Linzhi) | Kongpo Gyamda (Ch: Gongbujian g-da) | 2010      | fluctuating, increase                                      |        | weather                                                                                                               |     | (53)     |
| China | Yunnan      | Dechen (Ch: Diqing)   | Dechen (Ch: Diqing)                 | 2007      | unsustainable                                              |        |                                                                                                                       |     | (44)     |
| China | Yunnan      | Dechen                | Dechen                              | 2006–2008 | per capita, fluctuating                                    | (54)   | competition, weather                                                                                                  |     | (42)     |
| China | Yunnan      | Dechen                | Dechen                              | 2007–2011 | per capita, fluctuating                                    |        | competition, weather                                                                                                  |     | (56)     |
| China | Yunnan      | Dechen                | Gyaltang (Ch: Xianggelila)          | 2007      | unsustainable                                              |        |                                                                                                                       |     | (44)     |
| China | Yunnan      | Dechen                | Gyaltang                            | 2011      | per capita, fluctuating                                    |        | competition, weather                                                                                                  |     | (56)     |
| India | Sikkim      |                       | North Sikkim                        | 2015      | decrease                                                   |        | overexploitation                                                                                                      |     | (57)     |
| India | Uttarakhand | Garwhal               | Chamoli                             | 2011      | decrease, fluctuating                                      |        | weather                                                                                                               |     | (58)     |
| India | Uttarakhand | Garwhal               | Chamoli                             | 2014      | 86% decrease, 12% no change, 2% don't know                 | 88     | 68% overexploitation, 10% competition, 21% climate change, 23% other                                                  | 88  | (43)     |
| India | Uttarakhand | Garwhal               | Chamoli                             | < 2015    | decrease                                                   | (205)  |                                                                                                                       |     | (59)     |
| India | Uttarakhand | Garwhal               | Chamoli                             | 2015–2016 | 82% decrease, 3% increase, 9% no change, 6% don't know     | 312    | overexploitation, degradation                                                                                         |     | (60)     |
| India | Uttarakhand | Garwhal               | Uttarkashi                          | < 2015    | decrease                                                   | (312)  |                                                                                                                       |     | (59)     |
| India | Uttarakhand | Kumaon                | Pithoragarh                         | 2012–2014 | decrease, fluctuating                                      | (2511) | degradation                                                                                                           |     | (61)     |
| India | Uttarakhand | Kumaon                | Pithoragarh                         | < 2015    | decrease                                                   | (354)  |                                                                                                                       |     | (59)     |
| Nepal | No. 1       | Koshi                 | Sankhusabha                         | 2015      | decrease                                                   |        |                                                                                                                       |     | (62)     |
| Nepal | No. 7       | Mahakali              | Darchula                            | 2004–2007 | per capita                                                 |        | competition                                                                                                           |     | (63)     |
| Nepal | No. 7       | Mahakali              | Darchula                            | 2010–2014 | decrease                                                   | 51     | overexploitation                                                                                                      | 44  | (64)     |
| Nepal | Karnali     | Karnali               | Dolpa                               | 2011      | decrease                                                   | (54)   |                                                                                                                       |     | (65)     |
| Nepal | Karnali     | Karnali               | Dolpa                               | 2011      | 95% decrease, 1% increase, 3% no change, 1% don't know     | 203    | 75% overexploitation, > 66% climate change <sup>‡</sup>                                                               | 203 | (66, 67) |
| Nepal | Karnali     | Karnali               | Dolpa                               | 2016      | decrease                                                   | (35)   | overexploitation                                                                                                      |     | (68)     |
| Nepal | No. 5       | Rapti                 | Rukum                               | 2007      | decrease, no change                                        |        |                                                                                                                       |     | (69)     |

|       |       |            |         |      |          |      |
|-------|-------|------------|---------|------|----------|------|
| Nepal | No. 5 | Rapti      | Rukum   | 2012 | decrease | (70) |
| Nepal | No. 4 | Dhaulagiri | Baglung | 2012 | decrease | (70) |
| Nepal | No. 4 | Dhaulagiri | Myagdi  | 2012 | decrease | (70) |

\* For place names we use spellings from the Tibetan and Himalayan Library (<http://www.thlib.org>), except in several places where a different transliteration is more commonly used. Chinese names in pinyin are given in parentheses where they differ from the Tibetan. TAR = Tibet Autonomous Region.

† Sample sizes not in parentheses reflect the number of people who specifically responded to questions about caterpillar fungus change and its causes. Sample sizes in parentheses denote studies that listed the total sample size of interviewees, but gave only a generalized response about the changes they reported; therefore, the actual number of responses may have been lower than the total sample. If studies reported generalized responses without specifying any sample size for their interviews, the cell is left blank.

‡ Proportional responses were given, but they were reported in a way that prevented attributing exact percentages to our codes. For Shrivastava et al. (45), overexploitation and degradation were reported together. For Shrestha and Bawa (67), interviewees selected multiple types of climate change, making it impossible to accurately assign a total percentage of people who observed “climate change” as a general category. Therefore, we treat these cases as qualitative responses that are equally divided between “overexploitation” and “degradation” in the former case and “climate change” and “overexploitation” in the latter, with a low-confidence weighting for each, given our uncertainty in the true proportions.

\*\* Data collected through interviews as part of this current study.

**Table S5.** Candidate variables for inclusion in caterpillar fungus species distribution models. Those without a justification description were removed based on the variable selection decision tree (Fig. S4).

| Predictor variable         | Data product | Spatial resolution (m) | Data provider  | Included in model? | Justification                                                                                                                                                                                                                                                                                                                                                                                |
|----------------------------|--------------|------------------------|----------------|--------------------|----------------------------------------------------------------------------------------------------------------------------------------------------------------------------------------------------------------------------------------------------------------------------------------------------------------------------------------------------------------------------------------------|
| Elevation                  | SRTMv4.1     | 250                    | CGIAR-CSI (71) | Yes                | Well-defined elevation ranges reported in many case studies; LEK of differences in caterpillar fungus production along elevation gradients (7, 8, 43, 49, 72-76)                                                                                                                                                                                                                             |
| % Tree cover               | MOD44B.051   | 250                    | LPDAAC (77)    | No                 | --                                                                                                                                                                                                                                                                                                                                                                                           |
| % Non-tree vegetation      | MOD44B.051   | 250                    | LPDAAC (77)    | No                 | --                                                                                                                                                                                                                                                                                                                                                                                           |
| % Non-vegetated            | MOD44B.051   | 250                    | LPDAAC (77)    | Yes                | Vegetation composition and cover important for caterpillar fungus habitat in local-scale case studies; highest % deviance explained of all MODIS vegetation variables (72, 75, 76, 78, 79)                                                                                                                                                                                                   |
| Annual mean temp.          | Bioclim_1    | 1000                   | CHELSA (40)    | No                 | Removed a priori to focus on temperature dynamics at a finer temporal resolution                                                                                                                                                                                                                                                                                                             |
| Mean diurnal range         | Bioclim_2    | 1000                   | CHELSA (40)    | No                 | --                                                                                                                                                                                                                                                                                                                                                                                           |
| Isothermality              | Bioclim_3    | 1000                   | CHELSA (40)    | Yes                | Strong thermal seasonality affects insect life cycles and periods of hibernation; host caterpillars' physiology is sensitive to diurnal temperature fluctuations, and consequent behavioral changes may make them likelier to encounter fungal spores in the soil profile. Bioclim_3 is not highly correlated with Bioclim_11, unlike its component parts (Bioclim_2 and Bioclim_7) (80, 81) |
| Temp. seasonality          | Bioclim_4    | 1000                   | CHELSA (40)    | No                 | --                                                                                                                                                                                                                                                                                                                                                                                           |
| Max. temp. warmest month   | Bioclim_5    | 1000                   | CHELSA (40)    | No                 | --                                                                                                                                                                                                                                                                                                                                                                                           |
| Min. temp. coldest month   | Bioclim_6    | 1000                   | CHELSA (40)    | No                 | --                                                                                                                                                                                                                                                                                                                                                                                           |
| Temp. annual range         | Bioclim_7    | 1000                   | CHELSA (40)    | No                 | --                                                                                                                                                                                                                                                                                                                                                                                           |
| Mean temp. wettest quarter | Bioclim_8    | 1000                   | CHELSA (40)    | No                 | --                                                                                                                                                                                                                                                                                                                                                                                           |
| Mean temp. driest quarter  | Bioclim_9    | 1000                   | CHELSA (40)    | No                 | --                                                                                                                                                                                                                                                                                                                                                                                           |
| Mean temp. warmest quarter | Bioclim_10   | 1000                   | CHELSA (40)    | No                 | --                                                                                                                                                                                                                                                                                                                                                                                           |
| Mean temp. coldest quarter | Bioclim_11   | 1000                   | CHELSA (40)    | Yes                | <i>O. sinensis</i> and its host caterpillar species are highly adapted to low temperatures; highest % deviance explained of all winter temperature variables (82-84)                                                                                                                                                                                                                         |
| Annual precip.             | Bioclim_12   | 1000                   | CHELSA (40)    | No                 | Removed a priori to focus on precipitation dynamics at a finer temporal resolution                                                                                                                                                                                                                                                                                                           |
| Precip. wettest month      | Bioclim_13   | 1000                   | CHELSA (40)    | No                 | --                                                                                                                                                                                                                                                                                                                                                                                           |
| Precip. driest month       | Bioclim_14   | 1000                   | CHELSA (40)    | No                 | --                                                                                                                                                                                                                                                                                                                                                                                           |
| Precip. seasonality        | Bioclim_15   | 1000                   | CHELSA (40)    | Yes                | LEK suggests that caterpillar fungus is more productive under alternating periods of high precipitation (winter) and low (during fruiting); researchers suggest that <i>O. sinensis</i> populations are likely affected by seasonality of precipitation based on an observational field study (58, 85)                                                                                       |
| Precip. wettest quarter    | Bioclim_16   | 1000                   | CHELSA (40)    | Yes                | Summer precipitation is an important factor for vegetation communities in this region, and it may also help fungal spores penetrate the soil to infect caterpillars; caterpillars require a specific soil moisture range; highest % deviance explained of all summer precipitation variables (80, 86, 87)                                                                                    |
| Precip. driest quarter     | Bioclim_17   | 1000                   | CHELSA (40)    | No                 | --                                                                                                                                                                                                                                                                                                                                                                                           |
| Precip. warmest            | Bioclim_18   | 1000                   | CHELSA         | No                 | --                                                                                                                                                                                                                                                                                                                                                                                           |

|                         |            |      |              |     |                                                                                                                                                                                                              |
|-------------------------|------------|------|--------------|-----|--------------------------------------------------------------------------------------------------------------------------------------------------------------------------------------------------------------|
| quarter                 |            |      | (40)         |     |                                                                                                                                                                                                              |
| Precip. coldest quarter | Bioclim_19 | 1000 | CHELSEA (40) | Yes | According to LEK, winter snowfall is an important factor for caterpillar fungus production; Bioclim_19 is least highly correlated with Bioclim_16 of all the winter precipitation variables (42, 58, 60, 67) |

**Table S6.** Mean caterpillar fungus collection quantity and habitat area are shown by administrative unit. Habitat area is derived from the ensemble of the 4 species distribution models. The “QC” codes indicate quality control levels\*. Shaded rows designate data that were not used in the logistic regression either because they were not the best available for that administrative unit, or in the case of Dingxi prefecture and Kalikot district, because the production level results were implausibly high outliers in the model. If the collection year was unclear, we give an assumed year or range based on the publication date or other methods described by the study authors.

| QC* | Country | Province / Zone† | Prefecture/ District/ Dzongkhag/State† | County†                                                                                                | Years                | Mean collected (kg yr <sup>-1</sup> ) | Habitat area (km <sup>2</sup> ) | Mean density (kg km <sup>-2</sup> yr <sup>-1</sup> ) | Source              |
|-----|---------|------------------|----------------------------------------|--------------------------------------------------------------------------------------------------------|----------------------|---------------------------------------|---------------------------------|------------------------------------------------------|---------------------|
| 1   | Bhutan  |                  | Bumthang                               |                                                                                                        | 2006–2008, 2013–2017 | 67.85                                 | 269.13                          | 0.252                                                | (85, 88-92) ‡       |
| 1   | Bhutan  |                  | Gasa                                   |                                                                                                        | 2007–2010, 2013–2017 | 99.51                                 | 674.31                          | 0.148                                                | (85, 88-93) ‡       |
| 1   | Bhutan  |                  | Lhuentse                               |                                                                                                        | 2008–2010, 2013–2015 | 1.83                                  | 273.88                          | 0.0067                                               | (85, 88-90, 92, 94) |
| 1   | Bhutan  |                  | Paro                                   |                                                                                                        | 2006–2010, 2013–2017 | 12.89                                 | 170.06                          | 0.0758                                               | (85, 88-92) ‡       |
| 1   | Bhutan  |                  | Punakha                                |                                                                                                        | 2007                 | 3.00                                  | 64.25                           | 0.047                                                | (85)                |
| 1   | Bhutan  |                  | Thimphu                                |                                                                                                        | 2006–2009, 2013–2017 | 84.92                                 | 329.19                          | 0.258                                                | (85, 88-92, 95) ‡   |
| 1   | Bhutan  |                  | Trashiyangtse                          |                                                                                                        | 2007–2010, 2014–2017 | 9.25                                  | 80.00                           | 0.116                                                | (85, 88-92, 96) ‡   |
| 1   | Bhutan  |                  | Wangduephodrang                        |                                                                                                        | 2006–2010, 2013–2017 | 253.75                                | 544.06                          | 0.466                                                | (85, 88-92, 97) ‡   |
| 2   | China   | Gansu            | Dingxi                                 | Min, Weiyuan, Zhang                                                                                    | ≤ 2010               | 400                                   | 6.13                            | 65.306                                               | (98)                |
| 4   | China   | Gansu            | Gannan                                 | Choné, Drukchu, Luchu, Machu, Sangchu, Tewa, Tso (Ch: Zhuoni, Zhouqu, Luqu, Maqu, Xiahe, Diebu, Hezuo) | ≤ 2010               | 5,200                                 |                                 |                                                      | (98)                |
| 2   | China   | Gansu            | Linxia                                 | Kangle, Hezheng, Linxia, Jishishan                                                                     | ≤ 2010               | 50                                    | 126.50                          | 0.395                                                | (98)                |
| 4   | China   | Gansu            | Wuwei                                  | Pari (Ch: Tianzhu) – 5 townships                                                                       | ≤ 2010               | 2,000                                 |                                 |                                                      | (98)                |
| 4   | China   | Gansu            | Zhangye                                | Sunan – 3 townships                                                                                    | ≤ 2010               | 450                                   |                                 |                                                      | (98)                |
| 2   | China   | Qinghai          | Golog (Ch: Guoluo)                     |                                                                                                        | 2008, ≤ 2012         | 26,000                                | 11,793.00                       | 2.205                                                | (33, 99)            |
| 2   | China   | Qinghai          | Yulshul (Ch: Yushu)                    |                                                                                                        | ≤ 2012               | 14,000                                | 12,726.19                       | 1.100                                                | (99)                |
| 2   | China   | Sichuan          | Kardze (Ch: Ganzi)                     |                                                                                                        | ≤ 2012               | 11,000                                | 51,882.19                       | 0.212                                                | (99)                |
| 2   | China   | Sichuan          | Ngawa (Ch: Aba)                        |                                                                                                        | ≤ 2012               | 10,000                                | 17,298.88                       | 0.578                                                | (99)                |
| 1   | China   | TAR (Ch: Xizang) | Chamdo (Ch: Changdu)                   | Pembar (Ch: Bianba)                                                                                    | 2000–2009            | 937.35                                | 1,489.25                        | 0.629                                                | (54, 100, 101)      |
| 1   | China   | TAR              | Chamdo                                 | Riwoché (Ch: Leiwuqi)                                                                                  | 2000–2009            | 1,625.12                              | 2,497.88                        | 0.651                                                | (54, 100, 101)      |
| 1   | China   | TAR              | Chamdo                                 | Tengchen (Ch: Dingqing)                                                                                | 2000–2009            | 3,554.22                              | 2,101.81                        | 1.691                                                | (54, 100, 101)      |
| 3   | China   | TAR              | Chamdo                                 | Tengchen                                                                                               | ≤ 2007               | > 6,000                               |                                 |                                                      | (102)               |
| 1   | China   | TAR              | Chamdo                                 | Other Chamdo: Chamdo, Drakyap, Dzogang, Gonjo, Jomda, Lhorong, Markham, Pashö                          | 2000–2009            | 10,226.56                             | 16,892.56                       | 0.605                                                | (54, 100, 101)      |



|   |       |          |                       |                                                                                                | (Ch: Changdu, Chaya, Zuogong, Gongjue, Jiangda, Luolong, Mangkang, Basu) |              |          |         |                |
|---|-------|----------|-----------------------|------------------------------------------------------------------------------------------------|--------------------------------------------------------------------------|--------------|----------|---------|----------------|
| 3 | China | TAR      | Chamdo                |                                                                                                | ≤ 2012                                                                   | 13,000       |          |         | (99)           |
| 1 | China | TAR      | Lhasa (Ch: Lasa)      |                                                                                                | 2000–2009                                                                | 2,227.27     | 2,900.00 | 0.768   | (100, 101)     |
| 1 | China | TAR      | Lhoka (Ch: Shannan)   |                                                                                                | 2000–2009                                                                | 3,321.99     | 2,343.44 | 1.418   | (100, 101)     |
| 1 | China | TAR      | Nagchu (Ch: Naqu)     | Driru (Ch: Biru)                                                                               | 2000–2009                                                                | 4,645.88     | 1,801.56 | 2.579   | (54, 100, 101) |
| 3 | China | TAR      | Nagchu                | Driru                                                                                          | ≤ 2007                                                                   | 5,000–7,000  |          |         | (102)          |
| 1 | China | TAR      | Nagchu                | Lhari (Ch: Jiali)                                                                              | 2000–2009                                                                | 1,995.18     | 533.19   | 3.742   | (54, 100, 101) |
| 1 | China | TAR      | Nagchu                | Sogdzong (Ch: Suoxian)                                                                         | 2000–2009                                                                | 1,953.15     | 2,191.06 | 0.891   | (54, 100, 101) |
| 3 | China | TAR      | Nagchu                | Sogdzong                                                                                       | ≤ 2007                                                                   | 4,000–4,500  |          |         | (102)          |
| 3 | China | TAR      | Nagchu                | Lhari, Sogdzong                                                                                | 1998–2008                                                                | 2,000–2,500  |          |         | (103)          |
| 1 | China | TAR      | Nagchu                | Other Nagchu: Drachen, Nagchu, Nyenrong (Ch: Baqing, Naqu, Nierong)                            | 2000–2009                                                                | 8,198.82     | 1,294.19 | 6.335   | (54, 100, 101) |
| 3 | China | TAR      | Nagchu                | Drachen                                                                                        | ≤ 2007                                                                   | 5,000–10,000 |          |         | (102)          |
| 3 | China | TAR      | Nagchu                |                                                                                                | ≤ 2007                                                                   | 15,000       |          |         | (102)          |
| 3 | China | TAR      | Nagchu                |                                                                                                | ≤ 2012                                                                   | 14,000       |          |         | (99)           |
| 1 | China | TAR      | Nyingtri (Ch: Linzhi) | Nyingtri high: Kongpo Gyamda, Menling, Nang, Nyingtri (Ch: Gongbujiangda, Milin, Lang, Linzhi) | 2000–2009                                                                | 3,818.32     | 3,419.19 | 1.117   | (100-102)      |
| 1 | China | TAR      | Nyingtri              | Nyingtri low: Dzayül, Pomé (Ch: Chayu, Bomi)                                                   | 2000–2009                                                                | 197.87       | 472.63   | 0.419   | (100-102)      |
| 3 | China | TAR      | Nyingtri              |                                                                                                | ≤ 2007                                                                   | > 10,000     |          |         | (102)          |
| 1 | China | TAR      | Shigatse (Ch: Rikaze) |                                                                                                | 2000–2009                                                                | 1,691.88     | 5,547.75 | 0.305   | (100, 101)     |
| 2 | China | Yunnan   | Dechen (Ch: Diqing)   |                                                                                                | < 2010                                                                   | 300          | 1,199.31 | 0.250   | (33)           |
| 2 | India |          | Uttarakhand           |                                                                                                | 2003–2008                                                                | 1,525        | 5,334.31 | 0.286   | (33)           |
| 1 | Nepal | Karnali  | Dolpa                 |                                                                                                | 2009                                                                     | 1,560        | 1,941.56 | 0.803   | (31)           |
| 2 | Nepal | Karnali  | Humla                 |                                                                                                | ≤ 2004, 2006?, 2006–2009?                                                | 130.83       | 1,750.88 | 0.075   | (33, 104, 105) |
| 2 | Nepal | Karnali  | Jumla                 |                                                                                                | 2006–2009?, ≤ 2015                                                       | 250.50       | 1,102.63 | 0.227   | (104, 106)     |
| 2 | Nepal | Karnali  | Kalikot               |                                                                                                | ≤ 2004                                                                   | 200          | 190.44   | 1.050   | (33)           |
| 2 | Nepal | Karnali  | Mugu                  |                                                                                                | 2006?, 2006–2009?                                                        | 275          | 1,032.44 | 0.266   | (104, 105)     |
| 2 | Nepal | Mahakali | Darchula              |                                                                                                | 2004, 2006–2009?                                                         | 481**        | 754.81   | 0.637** | (32, 104)**    |

\* Quality control levels: “1” indicates preferred data, with the original source and collection year clearly stated. “2” indicates the best-available data, despite the original source and/or collection year not being clearly stated. “3” indicates data that were not used because the original source and/or collection year were not clearly stated, and level 1 data were available for that administrative unit instead. “4” indicates counties in Gansu prefecture for which collection data were given for a subset of townships within the

county; since Chinese township boundaries are not available, caterpillar fungus habitat areas could be not calculated.

† We use place name spellings from the Tibetan and Himalayan Library (<http://www.thlib.org>), except in several places where a different transliteration is more commonly used. Chinese names in pinyin are given in parentheses where they differ from the Tibetan. TAR = Tibet Autonomous Region.

‡ 2016 caterpillar fungus auction data are from Bhutan's Department of Agricultural Marketing and Cooperatives, sent by Sonam Wangdi in an email to K. Hopping on April 16, 2017.

\*\* A study published after the completion of our data analysis reported that 384.1 kg of caterpillar fungus was collected in Darchula district, Nepal in 2014 (107). Including this additional year of data would change the mean collection amount for Darchula to 403 kg yr<sup>-1</sup>, at a density of 0.534 kg km<sup>-2</sup> yr<sup>-1</sup>.

## Supplementary References

1. Lortie CJ (2014) Formalized synthesis opportunities for ecology: systematic reviews and meta-analyses. *Oikos* 123(8):897-902.
2. Graham CH, *et al.* (2008) The influence of spatial errors in species occurrence data used in distribution models. *Journal of Applied Ecology* 45(1):239-247.
3. Mitchell PJ, Monk J, & Laurenson L (2017) Sensitivity of fine-scale species distribution models to locational uncertainty in occurrence data across multiple sample sizes. *Methods in Ecology and Evolution* 8(1):12-21.
4. Hayes MA, Ozenberger K, Cryan PM, & Wunder MB (2015) Not to put too fine a point on it—does increasing precision of geographic referencing improve species distribution models for a wide-ranging migratory bat? *Acta Chiropterologica* 17(1):159-169.
5. Soutan A & Safi K (2017) The interplay of various sources of noise on reliability of species distribution models hinges on ecological specialisation. *PloS one* 12(11):e0187906.
6. Yan Y, *et al.* (2017) Range shifts in response to climate change of *Ophiocordyceps sinensis*, a fungus endemic to the Tibetan Plateau. *Biological Conservation* 206:143-150.
7. Li Y, *et al.* (2011) A survey of the geographic distribution of *Ophiocordyceps sinensis*. *Journal of microbiology* 49(6):913-919.
8. Saha D & Sundriyal R (2013) Perspectives of tribal communities on NTFP resource use in a global hotspot: Implications for adaptive management. *Journal of Natural Sciences Research* 3(4):125-169.
9. Quan QM, *et al.* (2014) Genetic diversity and distribution patterns of host insects of Caterpillar Fungus *Ophiocordyceps sinensis* in the Qinghai-Tibet Plateau. *PloS one* 9(3):e92293.
10. He S, Ma L, Yang J, Fu Y, & Chang Y (2014) Analysis of the soil physicochemical factors affecting the distribution of CORDYCEPS in the east edge of Qinghai-Tibet Plateau. *Medicinal Plant* 5(8):28.
11. Dormann CF, *et al.* (2013) Collinearity: a review of methods to deal with it and a simulation study evaluating their performance. *Ecography* 36(1):27-46.
12. Bell DM & Schlaepfer DR (2016) On the dangers of model complexity without ecological justification in species distribution modeling. *Ecological modelling* 330:50-59.
13. Morisette JT, *et al.* (2013) VisTrails SAHM: visualization and workflow management for species habitat modeling. *Ecography* 36(2):129-135.
14. Jarnevich CS, *et al.* (2017) Minimizing effects of methodological decisions on interpretation and prediction in species distribution studies: An example with background selection. *Ecological Modelling* 363:48-56.
15. Elith J, Leathwick JR, & Hastie T (2008) A working guide to boosted regression trees. *Journal of Animal Ecology* 77(4):802-813.
16. Breiman L (2001) Random forests. *Machine learning* 45(1):5-32.
17. Friedman JH (1991) Multivariate adaptive regression splines. *The Annals of Statistics* 19(1):1-67.
18. Friedman JH & Roosen CB (1995) *An Introduction to Multivariate Adaptive Regression Splines*. (Sage Publications, Thousand Oaks, CA).
19. Elith J & Leathwick J (2007) Predicting species distributions from museum and herbarium records using multiresponse models fitted with multivariate adaptive regression splines. *Diversity and Distributions* 13(3):265-275.
20. Nelder JA & Wedderburn RWM (1972) Generalized linear models. *Journal of the Royal Statistical Society. Series A (General)* 135(3):370-384.
21. Chan JC-W, Beckers P, Spanhove T, & Borre JV (2012) An evaluation of ensemble classifiers for mapping Natura 2000 heathland in Belgium using spaceborne angular hyperspectral (CHRIS/Proba) imagery. *International Journal of Applied Earth Observation and Geoinformation* 18:13-22.

22. Belgiu M & Drăguț L (2016) Random forest in remote sensing: A review of applications and future directions. *ISPRS Journal of Photogrammetry and Remote Sensing* 114:24-31.
23. Talbert CB & Talbert MK (2012) *User Manual for SAHM Package for VisTrails* (U. S. Geological Survey, Reston, VA) p 72.
24. Stevens FR, Gaughan AE, Linard C, & Tatem AJ (2015) Disaggregating census data for population mapping using random forests with remotely-sensed and ancillary data. *PloS one* 10(2):e0107042.
25. Liu C, White M, & Newell G (2013) Selecting thresholds for the prediction of species occurrence with presence-only data. *Journal of biogeography* 40(4):778-789.
26. Fielding AH & Bell JF (1997) A review of methods for the assessment of prediction errors in conservation presence/absence models. *Environmental conservation* 24(1):38-49.
27. Allouche O, Tsoar A, & Kadmon R (2006) Assessing the accuracy of species distribution models: prevalence, kappa and the true skill statistic (TSS). *Journal of applied ecology* 43(6):1223-1232.
28. Elith J, Kearney M, & Phillips S (2010) The art of modelling range-shifting species. *Methods in ecology and evolution* 1(4):330-342.
29. Gruber S (2012) Derivation and analysis of a high-resolution estimate of global permafrost zonation. *The Cryosphere* 6(1):221-233.
30. Ran Y, *et al.* (2012) Distribution of permafrost in China: an overview of existing permafrost maps. *Permafrost and Periglacial Processes* 23(4):322-333.
31. Chettri R & Gotame B (2010) Employment generation and economic upscaling from collection and trade of caterpillar fungus in Nepal. in *Forest People* (Pokhara, Nepal).
32. Chettri R & Lhodiya LS (2008) Collection of *Cordyceps sinensis* (Berk.) Sacc. (Yarsagumba) and its implications to rural livelihood and biodiversity conservation: a case of Darchula district, Nepal. *Medicinal Plants in Nepal: An Anthology of Contemporary Research*, eds Jha PK, Karmacharya SB, Chettri MK, Thapa CB, & Shrestha BB (Ecological Society (ECOS), Kathmandu, Nepal), pp 214-224.
33. Winkler D (2009) Caterpillar Fungus (*Ophiocordyceps sinensis*) Production and Sustainability on the Tibetan Plateau and in the Himalayas. *Asian Medicine* 5(2):291-316.
34. Whittingham MJ, Stephens PA, Bradbury RB, & Freckleton RP (2006) Why do we still use stepwise modelling in ecology and behaviour? *Journal of Animal Ecology* 75(5):1182-1189.
35. R Core Team (2017) R: A language and environment for statistical computing. R Foundation for Statistical Computing, Vienna, Austria. URL <https://www.R-project.org/>.
36. Venables WN & Ripley BD (2002) *Modern Applied Statistics with S* (Springer, New York) 4th Ed.
37. Hurvich CM & Tsai C-L (1989) Regression and time series model selection in small samples. *Biometrika* 76(2):297-307.
38. Ginzburg LR & Jensen CX (2004) Rules of thumb for judging ecological theories. *Trends in Ecology & Evolution* 19(3):121-126.
39. Herrmann SM, Anyamba A, & Tucker CJ (2005) Recent trends in vegetation dynamics in the African Sahel and their relationship to climate. *Global Environmental Change* 15(4):394-404.
40. Karger DN, *et al.* (2017) Climatologies at high resolution for the earth's land surface areas. *Scientific Data* 4:170122.
41. Hijmans RJ, Phillips S, Leathwick J, Elith J, & (2017) dismo: Species Distribution Modeling), 1.1-4.
42. Weckerle CS, Yang Y, Huber FK, & Li Q (2010) People, money, and protected areas: the collection of the caterpillar mushroom *Ophiocordyceps sinensis* in the Baima Xueshan Nature Reserve, Southwest China. *Biodiversity and Conservation* 19(9):2685-2698.
43. Caplins L & Halvorson SJ (2017) Collecting *Ophiocordyceps sinensis*: an emerging livelihood strategy in the Garhwal, Indian Himalaya. *Journal of Mountain Science* 14(2):390-402.
44. Stewart MO (2009) Exploring the rush for "Himalayan gold": Tibetan yartsa gunbu harvesting in northwest Yunnan and considerations for management. *Contemporary Visions in Tibetan Studies*:

- Proceedings of the First International Seminar of Young Tibetologists*, eds Dotson B, Gurung KN, Halkias G, & Myatt T (Serindia Publications, Inc., Chicago, Illinois), pp 69-91.
45. Shrivastava VK, Theilade I, & Meilby H (2010) Trade chain analysis of *Ophiocordyceps sinensis* and *Tricholoma matsutake* in Bhutan. *Scandinavian Forest Economics*, eds Helles F & Nielsen PS, pp 396-416.
  46. Wangchuk S, Norbu N, & Sherub (2012) Impacts of Cordyceps Collection on Livelihoods and Alpine Ecosystems in Bhutan as Ascertained from Questionnaire Survey of Cordyceps Collectors. (Wangchuk, S, Norbu, N, Sherub, Royal Government of Bhutan, UWICE Press: Bumthang, Bhutan).
  47. Gyeltshen C (2010) Status and Distribution of *Cordyceps sinensis* (Berk.) Sacc. in Namna Region (Paro) of Bhutan and its Contribution to Local Livelihood. BSc (Dolphin (P.G) Institute of Bio-Medical and Natural Sciences, Uttarakhand, India).
  48. Winkler D (2013) Steps towards Sustainable Harvest of Yartsa Gunbu (Caterpillar Fungus, *Ophiocordyceps sinensis*). *Proceedings of the 7th International Medicinal Mushroom Conference*, pp 635-644.
  49. Lama KT (2007) Crowded Mountains, Empty Towns: Commodification and Contestation in Cordyceps Harvesting in Eastern Tibet. MS Thesis (University of Colorado, Boulder, Colorado).
  50. Bum T (2016) The changing roles of Tibetan mountain deities in the context of emerging environmental issues: Dkar Po Lha Bsham in Yul Shul. *Asian Highland Perspectives* 40:1-33.
  51. Woodhouse E, McGowan P, & Milner-Gulland E (2014) Fungal gold and firewood on the Tibetan plateau: examining access to diverse ecosystem provisioning services within a rural community. *Oryx* 48(1):30-38.
  52. Boesi A (2003) dByar rtswa dgun'bu (*Cordyceps sinensis* Berk): An Important Trade Item for the Tibetan Population of Li thang County, Sichuan Province, China. *The Tibet Journal* 28(3):29-42.
  53. Wang M, Kampot T, & Zhuoga DB (2011) Contribution of *Cordyceps sinensis* to Tibetan pastoralist income and problems in its sustainable use. in *Pastoralism and Rangeland Management on the Tibetan Plateau in the Context of Climate and Global Change*, eds Kreutzmann H, Yong Y, & Richter J (Lhasa, China), p 312.
  54. Winkler D (2008) The mushrooming fungi market in Tibet exemplified by *Cordyceps sinensis* and *Tricholoma matsutake*. *Journal of the International Association of Tibetan studies* 4:1-47.
  55. Wang Y, Wang J, Li S, & Qin D (2014) Vulnerability of the Tibetan pastoral systems to climate and global change. *Ecology and Society* 19(4):8.
  56. Stewart MO (2014) The Rise and Governance of 'Himalayan Gold': Transformations in the Caterpillar Fungus Commons in Tibetan Yunnan, China. PhD (University of Colorado, Boulder, Colorado).
  57. Pradhan BK (2016) Caterpillar Mushroom, *Ophiocordyceps sinensis* (Ascomycetes): A Potential Bioresource for Commercialization in Sikkim Himalaya, India. *International Journal of Medicinal Mushrooms* 18(4):337-346.
  58. Kuniyal CP & Sundriyal RC (2013) Conservation salvage of *Cordyceps sinensis* collection in the Himalayan mountains is neglected. *Ecosystem Services* 3:e40-e43.
  59. Rautela P & Karki B (2015) Impact of climate change on life and livelihood of indigenous people of higher himalaya in Uttarakhand, India. *American Journal of Environmental Protection* 3(4):112-124.
  60. Yadav PK, et al. (2016) Conserving *Ophiocordyceps sinensis* in the Nanda Devi Biosphere Reserve, India. (Yadav PK, Saha S, Mishra, AK, et al., CICADA – Centre for Integration of Conservation and Developmental Accountability. Dehradun, India).
  61. Negi CS, Pant M, Joshi P, & Bohra S (2016) Conserving the caterpillar fungus [*Ophiocordyceps sinensis* (Berk.) GH Sung et al.]: A case study of habitat ecology and sustainability in district Pithoragarh, Western Himalaya, India. *International Journal of Biodiversity and Conservation* 8(9):196-205.

62. Byers AC, Byers EA, & Sharma B (2016) Contemporary Impacts of Yarsugumba ("caterpillar fungus") Harvesting on Alpine Ecosystems and Wildlife Populations in Highland Nepal. (Byers AC, Byers EA and Sharma B, National Geographic Society report), p 52.
63. Amatya G (2008) Trade and socio-economic attribution of *Cordyceps sinensis* (Yarsagumba) in Darchula district, Nepal. *Medicinal Plants in Nepal: An Anthology of Contemporary Research*, eds Jha PK, Karmacharya SB, Chettri MK, Thapa CB, & Shrestha BB (Ecological Society (ECOS), Kathmandu, Nepal), pp 195-203.
64. Pant B, *et al.* (2017) Horizontal integration of multiple institutions: solutions for Yarshagumba related conflict in the Himalayan region of Nepal? *International Journal of the Commons* 11(1):464–486.
65. Pierce GE (2012) The vitality of ice and bone: known uncertainty and awareness in change through Dolpo, Nepal. MS (Colorado State University, Fort Collins, CO).
66. Shrestha UB & Bawa KS (2013) Trade, harvest, and conservation of caterpillar fungus (*Ophiocordyceps sinensis*) in the Himalayas. *Biological Conservation* 159:514-520.
67. Shrestha UB & Bawa KS (2015) Harvesters' perceptions of population status and conservation of Chinese caterpillar fungus in the Dolpa region of Nepal. *Regional Environmental Change* 15(8):1731-1741.
68. Sousa J (2016) They Come Like the Clouds: Governing the Mountainous Periphery. *Independent Study Project (ISP) Collection: Paper 2401*.
69. Cox JH (2008) Uncontrolled exploitation of yarsagumba *Cordyceps sinensis* in Rukum and Dolpa districts, Nepal: observations in May-June 2007 and a suggested course of action. (Cox JH, The Mountain Institute and Department of National Parks and Wildlife Conservation, Ministry of Forests and Soil Conservation, Government of Nepal), p 5.
70. Thapa BB, *et al.* (2014) An assessment of Yarsagumba (*Ophiocordyceps sinensis*) collection in Dhorpatan Hunting Reserve, Nepal. *Journal of Mountain Science* 11(2):555-562.
71. Jarvis A, Reuter HI, Nelson A, & Guevara E (2008) Hole-filled SRTM for the globe Version 4. available from the CGIAR-CSI SRTM 90m Database 15: <http://srtm.csi.cgiar.org>.
72. Devkota S (2009) The frequency and relationship of flowering plants on the distribution pattern of *Ophiocordyceps sinensis* (Yarchagunbu) in the highlands of Dolpa district, Nepal. *Banko Janakari* 19(1):29-36.
73. Namgyel P (2008) Conservation and Income Generation Opportunities from High-Value Species: Cordyceps Policy in Bhutan and its Implications for the Himalayan Region. *Biodiversity Conservation in the Kangchenjunga Landscape*, eds Chettri N, Shakya B, & Sharma E (ICIMOD, Kathmandu, Nepal), pp 117-122.
74. Chhetri R (2009) Yarsagumba resource assessment in Dolpa District of Nepal. in *Community Forestry International Workshop* (Pokhara, Nepal).
75. Sigdel SR, Rokaya MB, Münzbergová Z, & Liang E (2017) Habitat Ecology of *Ophiocordyceps sinensis* in Western Nepal. *Mountain Research and Development* 37(2):216-223.
76. Wu QG, Su ZX, Su RJ, Hu JY, & Wang H (2009) The dominant factors of habitat selection of *Cordyceps sinensis*. *Guihaia* 29(3):331-336.
77. DiMiceli M (2017) MOD44B MODIS/Terra Vegetation Continuous Fields Yearly L3 Global 250m SIN Grid V006. *NASA EOSDIS Land Processes DAAC*.
78. Maczey N, Zhang F, & Cannon PF (2010) Ecology of *Thitarodes* spp., hosts of the economically important entomopathogenic fungus *Ophiocordyceps sinensis* in Bhutan. *Chinese Journal of Grassland* 32(Supp.):109-121.
79. Negi CS, Koranga PR, & Ghinga HS (2006) Yar tsa Gumba (*Cordyceps sinensis*): A call for its sustainable exploitation. *The International Journal of Sustainable Development and World Ecology* 13(3):165-172.
80. Yang Y, Yang D, Shen F, & Dong D (1989) Studies on Hepialid larvae for being infected by Chinese "insect herb" fungus (*Cordyceps sinensis*). *Zoological Research* 10(3):227-231.

81. Mani MS (1968) *Ecology and biogeography of high altitude insects* (Springer Science & Business Media, Dordrecht).
82. Xia E-H, *et al.* (2017) The caterpillar fungus, *Ophiocordyceps sinensis*, genome provides insights into highland adaptation of fungal pathogenicity. *Scientific Reports* 7:1806.
83. Min Q, *et al.* (2017) Differential expression patterns of two delta-9-acyl-CoA desaturases in *Thitarodes pui* (Lepidoptera: Hepialidae) during different seasons and cold exposure. *Ecology and Evolution* 7(6):1909-1918.
84. Hu X, *et al.* (2013) Genome survey uncovers the secrets of sex and lifestyle in caterpillar fungus. *Chin Sci Bull* 58:2846-2854.
85. Cannon PF, *et al.* (2009) Steps towards sustainable harvest of *Ophiocordyceps sinensis* in Bhutan. *Biodiversity and Conservation* 18(9):2263-2281.
86. Ding M, *et al.* (2007) The relationship between NDVI and precipitation on the Tibetan Plateau. *Journal of Geographical Sciences* 17(3):259-268.
87. Zhang G, Yu J, Wu G, & Liu X (2011) Factors influencing the occurrence of *Ophiocordyceps sinensis*. *Acta Ecologica Sinica* 31(14):4117-4125.
88. DAMC (2013) Report on cordyceps auctioning, 2013. (DAMC (Department of Agricultural Marketing and Cooperatives)).
89. DAMC (2014) Cordyceps marketing report for the year 2014. (DAMC (Department of Agricultural Marketing and Cooperatives), Thimphu, Bhutan).
90. DAMC (2015) Cordyceps marketing report for the year 2015. (DAMC (Department of Agricultural Marketing and Cooperatives), Thimphu, Bhutan).
91. DAMC (2017) Cordyceps Marketing Report - 2017. (DAMC (Department of Agricultural Marketing and Cooperatives), Thimphu, Bhutan).
92. unknown (2009) Cordyceps auction report.
93. Gasa Dzongkhag Administration (2011) Annual Dzongkhag Statistics 2011. (Gasa Dzongkhag Administration, Gasa, Bhutan).
94. Wangmo C (February 1, 2013) Unscientific methods of picking leads to poor harvest of Cordyceps. *Bhutan Observer*.
95. Chhetri P (April 27, 2011) Easing cordyceps business. *Bhutan Observer*.
96. Trashy Yangtse Dzongkhag Administration (2011) Annual Dzongkhag Statistics 2011. (Trashy Yangtse Dzongkhag Administration, Trashy Yangtse, Bhutan).
97. Wangdue Phodrang Dzongkhag Administration (2011) Annual Dzongkhag Statistics 2011. (Wangdue Phodrang Dzongkhag Administration, Wangdue Phodrang, Bhutan).
98. Zhao Z, Wang J-Q, & Yang P-Y (2010) Countermeasure on the management of *Cordyceps sinensis* in Gansu province. *Chinese Journal of Grassland* 32(Supp.):28-31 (in Chinese).
99. Tsering G & Li Z-M (2012) Tibetan ecological protection, resource development, and farmers' income: taking caterpillar fungus as example. *Tibetan Studies* 5:114-120 (in Chinese).
100. Winkler D (2008) Yartsa Gunbu (*Cordyceps sinensis*) and the Fungal Commodification of Tibet's Rural Economy. *Economic Botany* 62(3):291-305.
101. Winkler D (2010) Caterpillar fungus (*Ophiocordyceps sinensis*) on the Tibetan Plateau. *Geographische Rundschau International* 6(4):44-49.
102. Drolma T (2007) The status quo of Tibetan traditional medicine and thoughts on its development. *China Tibetology* 9(2):82-91.
103. Luorongzhandui, Gruschke A, & Breuer I (2017) Regulating Access to Pastoral Resources in the TAR: Caterpillar Fungus, Livelihoods, and the State. *Tibetan Pastoralists and Development: Negotiating the Future of Grassland Livelihoods*, eds Gruschke A & Breuer I (Reichert Verlag, Wiesbaden), pp 83-94.
104. Devkota S (2010) *Ophiocordyceps sinensis* (Yarsagumba) from Nepal Himalaya: status, threats and management strategies. in *Cordyceps Resources and Environment* (Devkota, S, Grassland Supervision Center, Ministry of Agriculture. P. R. China), pp 91-108.

105. Parajuli DP, Devkota S, & Shrestha A (2006) A Study on Ethno-ecology, Regeneration Pattern, Collection Techniques and Trade of Yarsagumba (*Cordyceps sinensis*): Research in Kanchenjunga Conservation Area and Dolpa Region of Nepal for Policy Recommendation. (Parajuli DP, Devkota S, and Shrestha S, WWF Nepal Program and SAFE Concern. Kathmandu, Nepal).
106. Shrestha UB, Dhital KR, & Gautam AP (2017) Economic dependence of mountain communities on Chinese caterpillar fungus *Ophiocordyceps sinensis* (yarsagumba): a case from western Nepal. *Oryx*:1-9.
107. Pouliot M, Pyakurel D, & Smith-Hall C (2018) High altitude organic gold: The production network for *Ophiocordyceps sinensis* from far-western Nepal. *Journal of Ethnopharmacology* 218:59-68.
